# Supplementary material for: Proglacial methane emissions driven by meltwater and groundwater flushing in a high Arctic glacial catchment
Source: Copernicus journal article supplement (doi:10.5194/egusphere-2024-1273), 2024-04-30

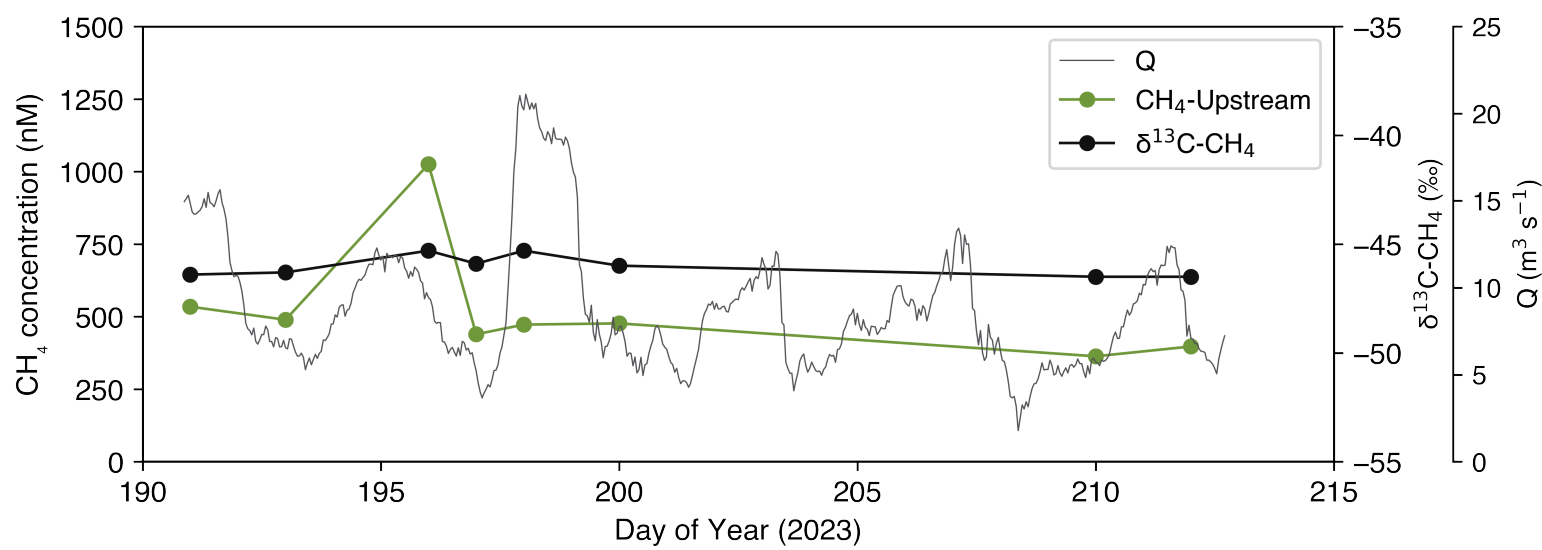

Supplement: Supplementary file [file egusphere-2024-1273-AC2-supplement.pdf]
