# Supplementary material for: Proglacial methane emissions driven by meltwater and groundwater flushing in a high Arctic glacial catchment
Source: Copernicus journal article supplement (doi:10.5194/egusphere-2024-1273), 2024-04-30

**a** 19 July 2023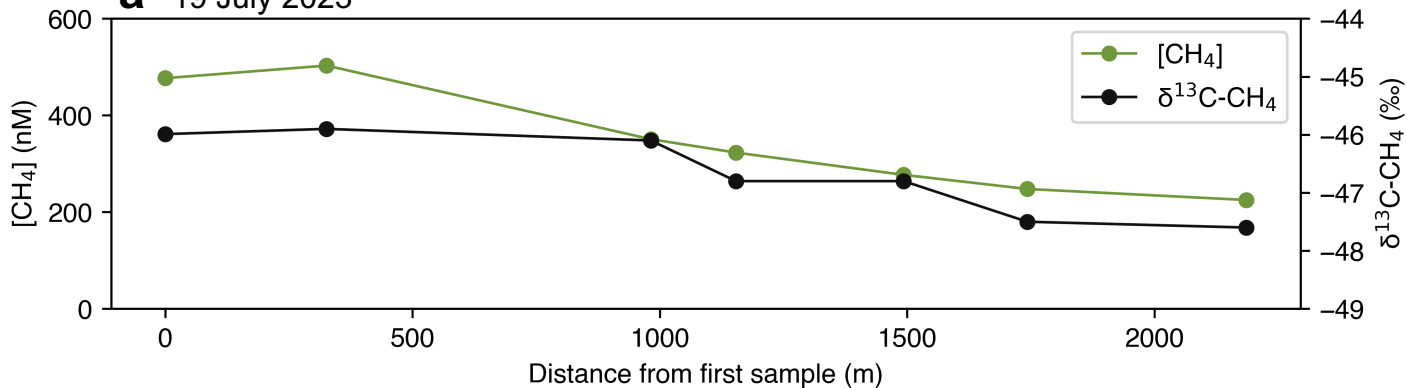**b** 31 July 2023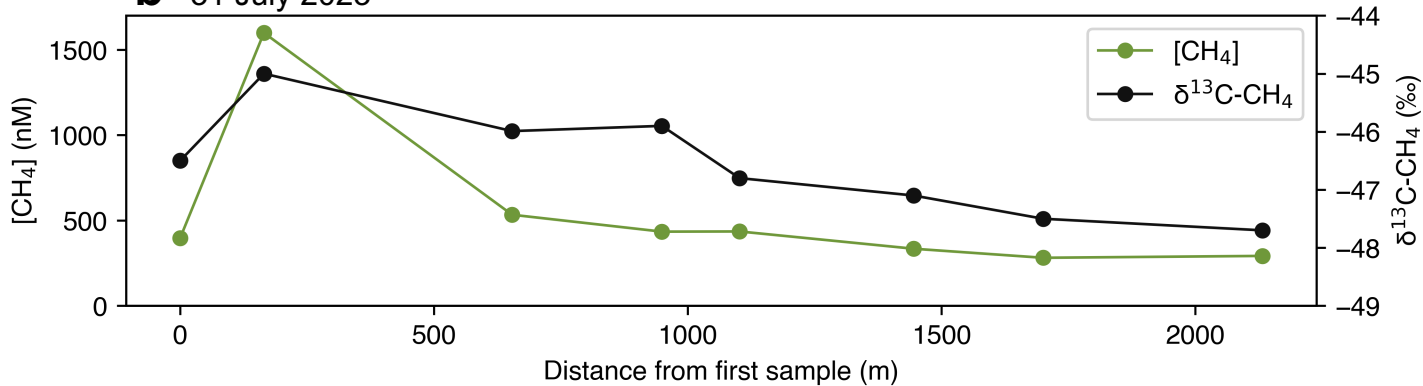

Supplement: Supplementary file [file egusphere-2024-1273-AC5-supplement.pdf]
